# Supplementary material for: TRPV4-Rho GTPase complex structures reveal mechanisms of gating and disease
Source: PubMed Central journal article supplement (PMC10290081; doi:10.1038/s41467-023-39345-0), 2023-06-23
Supplement: 41467_2023_39345_MOESM1_ESM.pdf [file 41467_2023_39345_MOESM1_ESM.pdf]

## Supplementary Information

### TRPV4-Rho GTPase complex structures reveal mechanisms of gating and disease

Do Hoon Kwon<sup>1,†</sup>, Feng Zhang<sup>1,†</sup>, Brett A. McCray<sup>2</sup>, Shasha Feng<sup>3</sup>, Meha Kumar<sup>2</sup>, Jeremy M. Sullivan<sup>2</sup>, Wonpil Im<sup>3</sup>, Charlotte J. Sumner<sup>2,4</sup> & Seok-Yong Lee<sup>1,\*</sup>

#### Affiliations:

<sup>1</sup> Department of Biochemistry, Duke University School of Medicine, Durham, North Carolina, 27710, USA.

<sup>2</sup> Department of Neurology, Johns Hopkins University School of Medicine, Baltimore, Maryland, 21205, USA

<sup>3</sup> Departments of Biological Sciences, Chemistry, and Bioengineering, Lehigh University, Bethlehem, Pennsylvania, 18015, USA.

<sup>4</sup> Department of Neuroscience, Johns Hopkins University School of Medicine, Baltimore, Maryland, 21205, USA

† These authors contributed equally.

\*Correspondence to:

S.-Y. Lee

Email: seok-yong.lee@duke.edu

Telephone: 919-684-1005

### Supplementary Information

|                                          |       |
|------------------------------------------|-------|
| A. Supporting Information Figures S1-S11 | 2-19  |
| B. Supporting Information Table S1       | 20    |
| C. Source gel data.                      | 21-22 |

**a**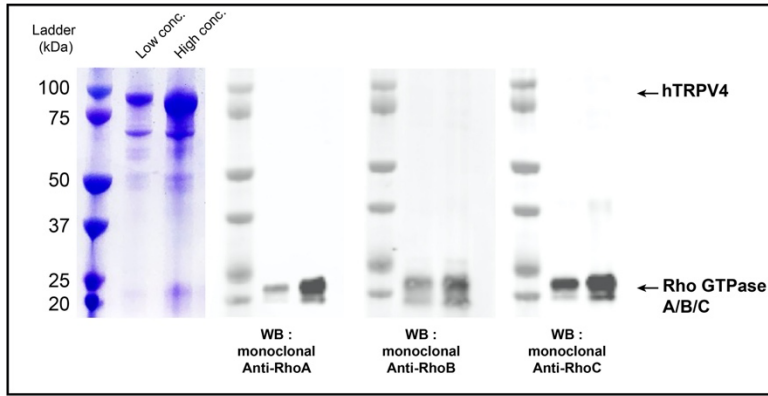**b**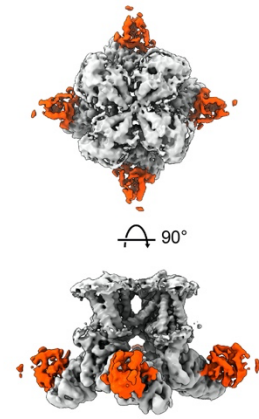**c**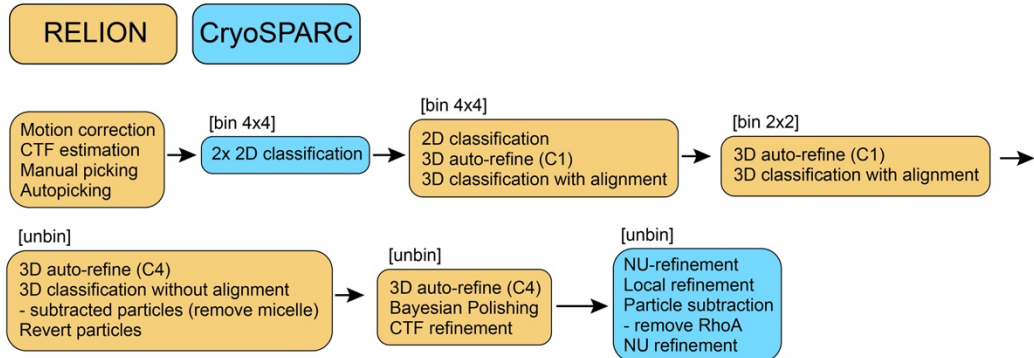**d**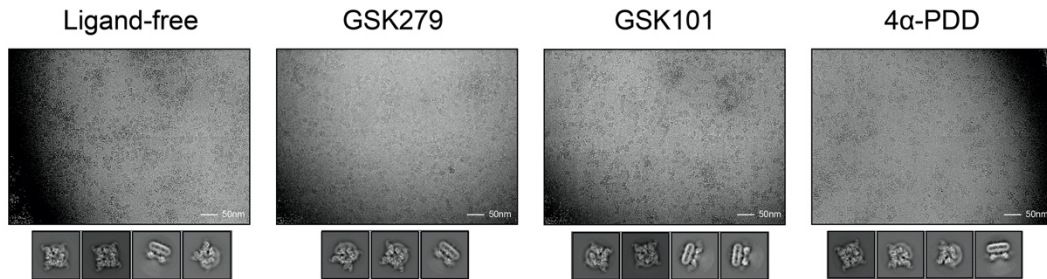**e**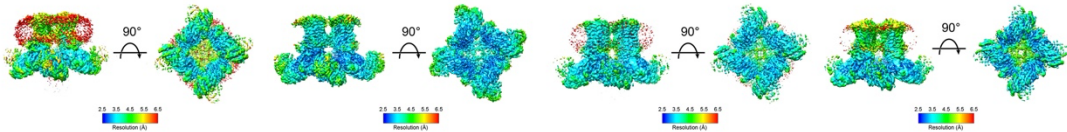**f**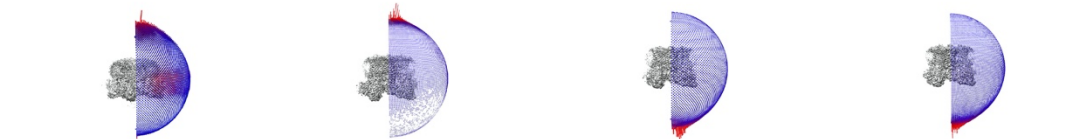**g**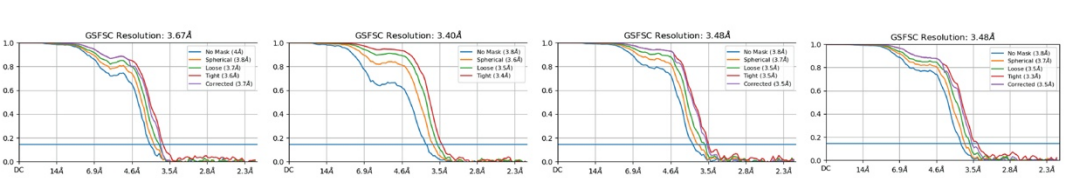**h**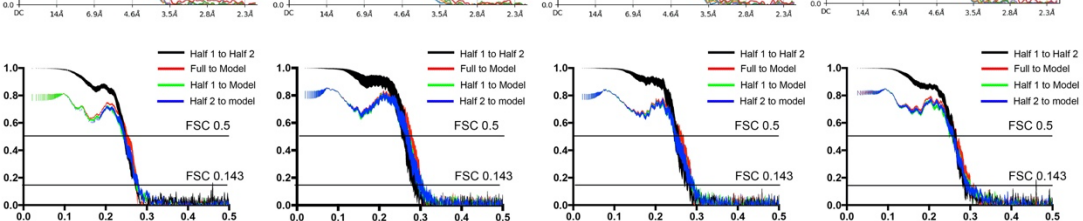

### **Supplementary Fig. 1. Cryo-EM data processing summary**

**a**, SDS-PAGE and western blot of purified TRPV4 show co-purified Rho GTPase. The results shown are representatives of  $n \geq 6$  purifications and  $n \geq 4$  western blots.

**b**, Cryo-EM reconstruction of GSK279-TRPV4-RhoA with C1 symmetry. The four RhoA densities (red) are equally strong, indicating that RhoA binds to each protomer of TRPV4.

**c**, General cryo-EM data processing procedure. Tasks performed in the RELION software are colored in orange and those in cryoSPARC in blue.

**d**, Representative micrographs of TRPV4-RhoA sample in vitreous ice and 2D classification images. Approximately 1 million particles of each dataset were selected and used for further 3D classifications.

**e**, Local resolution estimations.

**f**, Euler distribution plots.

**g**, Fourier shell correlation (FSC) curves of the final 3D reconstructions with different masks, as calculated in cryoSPARC.

**h**, Map-to-model correlation plots for both full and half maps.

**a**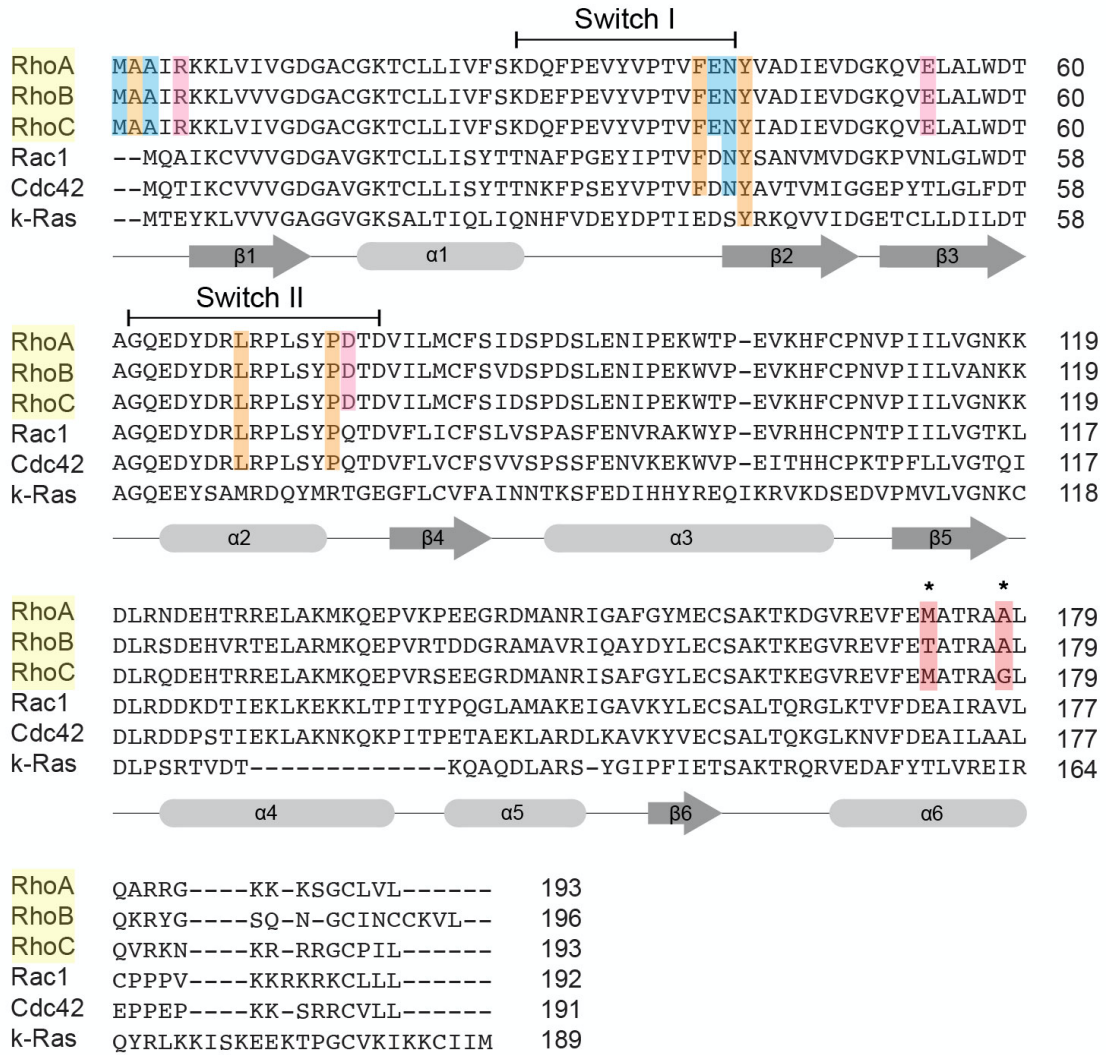**b**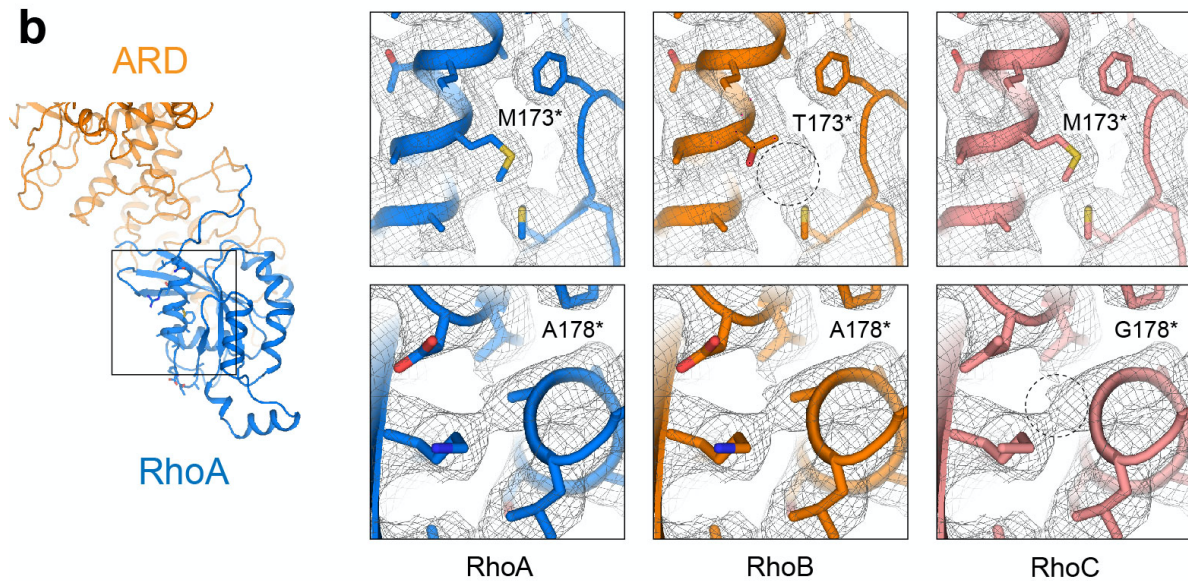

### **Supplementary Fig. 2. Sequence alignment of the Rho GTPase family**

**a**, Secondary structure elements based on RhoA are shown as gray cylinders (helices) and arrows (beta-strand). The Rho GTPase residues critical for TRPV4 interaction are highlighted: blue for backbone - M1, A3, E40, N41, pink for sidechain - R5, E54, D76, orange for hydrophobic - A2, F39, Y42, L69, P75, and red for subtype-specific sites M173 and A178.

**b**, Close-up views of the  $\alpha 6$ - $\beta 5$  region of Rho GTPase in the TRPV4 ARD-RhoA focused-map. The dotted circles indicate cryo-EM density unaccounted for in the respective models for RhoB and RhoC. Gray mesh indicates cryo-EM densities contoured at 0.15 thresholding.

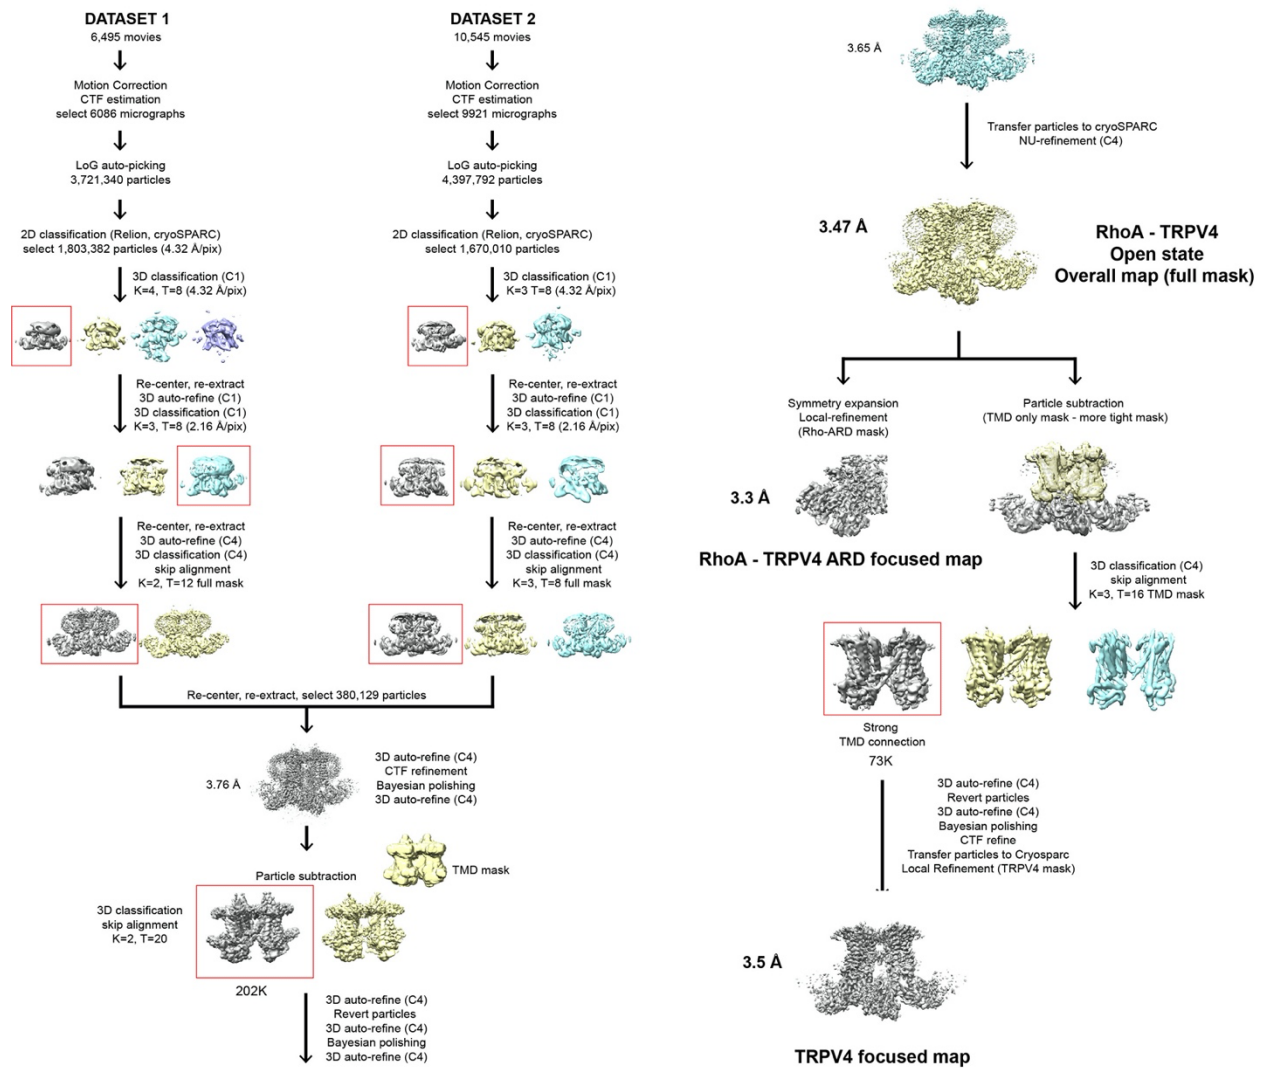

### Supplementary Fig. 3. Cryo-EM data processing of the open state (GSK101) structure

The detailed procedure for determining the open state GSK101-TRPV4-RhoA structure.

The final cryo-EM reconstruction was resolved at a resolution of 3.47 Å for GSK101-TRPV4-

RhoA, at 3.3 Å for the RhoA-ARD focused map, and at 3.5 Å for the TRPV4 focused map.

**a** GSK279

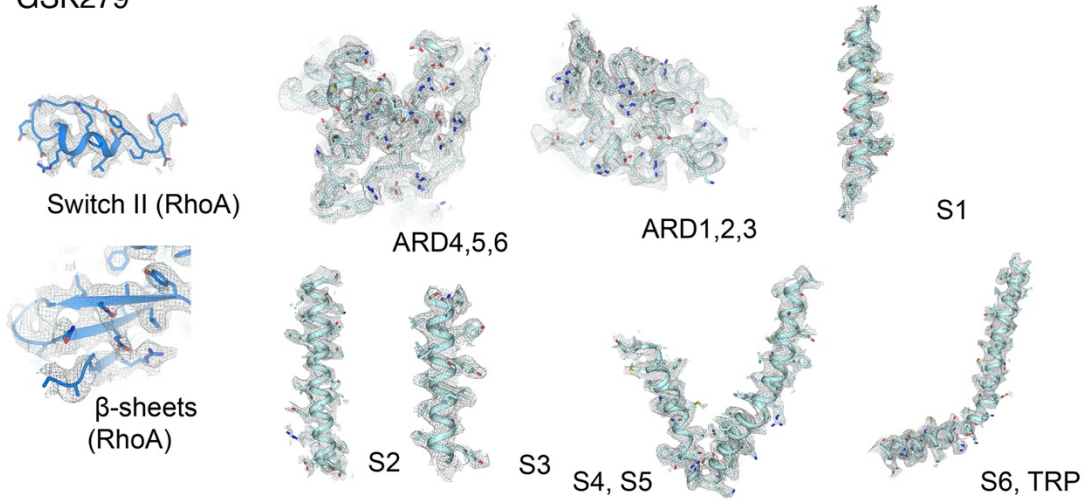

**b** GSK101

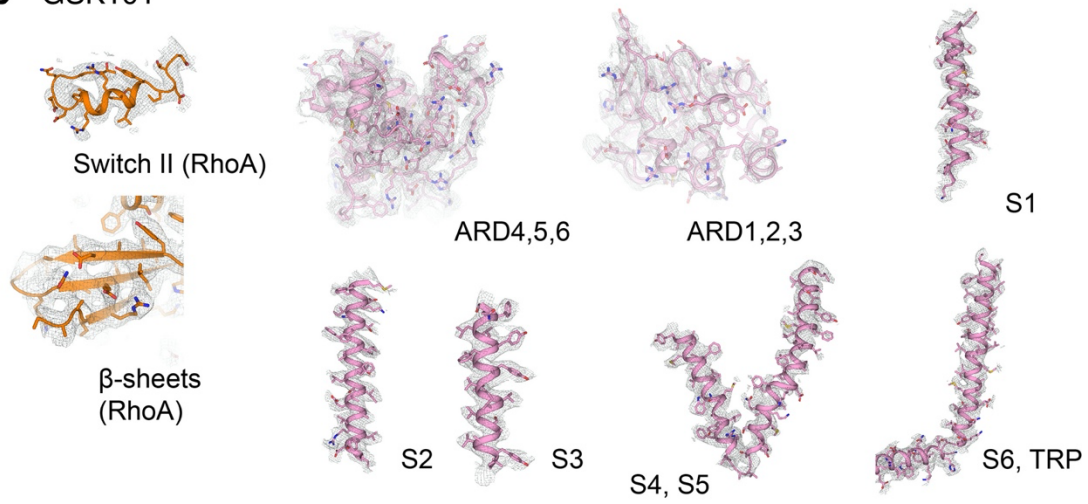

**c** 4 $\alpha$ -PDD

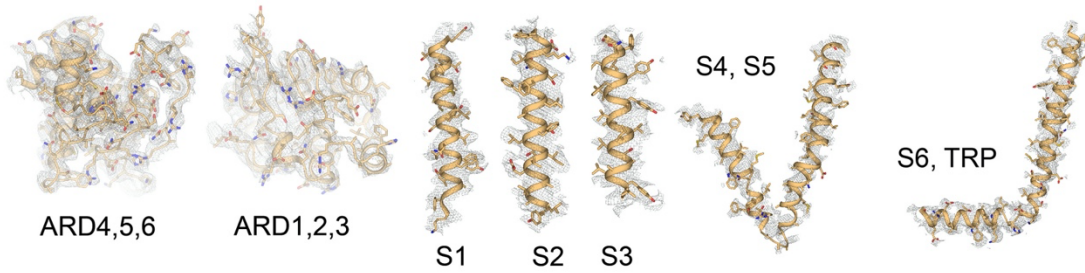

**d** Apo

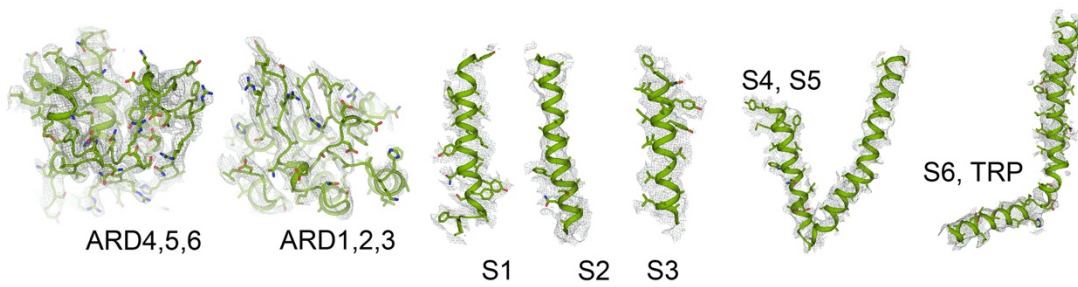

**Supplementary Fig. 4. Representative cryo-EM density of the TRPV4-RhoA reconstructions**

**a-d**, Representative cryo-EM densities for various structural elements in the reconstructions of GSK279-TRPV4-RhoA (**a**, blue and cyan), GSK101-TRPV4-RhoA (**b**, orange and pink), 4 $\alpha$ -PDD-TRPV4-RhoA, (**c**, light gold), and ligand-free-TRPV4-RhoA (**d**, green). The RhoA densities in the GSK279- and GSK101-bound reconstructions are from the focused-refined maps. EM densities are shown as gray meshes at thresholding of 0.23-0.25, 0.22–0.24, 0.17–0.19, and 0.16–0.18, respectively, in **a-d**.



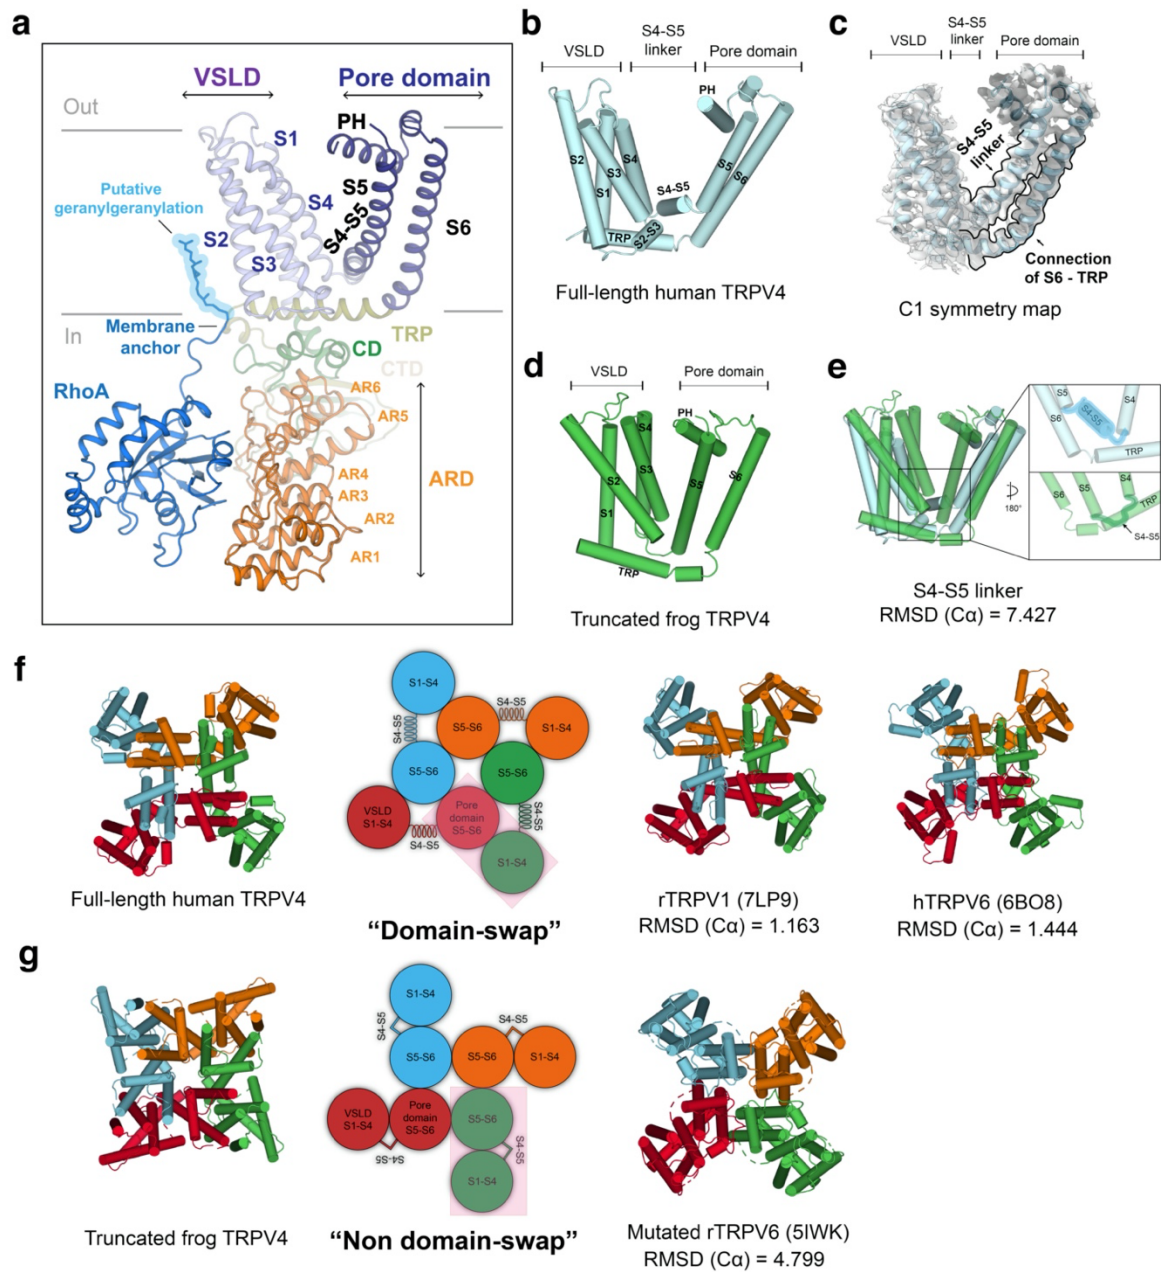

**Supplementary Fig. 5. Structural comparisons between human TRPV4 and frog TRPV4**

**a**, Architecture of the human TRPV4 protomer and RhoA with subdomains indicated: ankyrin repeat domain (ARD), coupling domain (CD), transmembrane helices (S1-S6), pore helix (PH), TRP helix, C-terminal domain (CTD), and RhoA. Membrane-anchored lipid tail of RhoA is highlighted in blue.

**b**, Cylinder representation of the TMD of human TRPV4 in cyan.

**c**, Cryo-EM density (C1 symmetry) of the GSK279-TRPV4-RhoA complex with the domain-swapping linkers (S4-S5 and S6-TRP) outlined, at thresholding 0.35.

**d**, Cylinder representation of the TMD of the truncated frog TRPV4 structure in green.

**e**, Comparison of the TMDs of the human TRPV4 and the frog TRPV4 structures viewed from the membrane plane. The linkers between S4 and S5 are highlighted.

**f**, The domain-swapping architectures of the human TRPV4, the rat TRPV1, and the human TRPV6 structures.

**g**, The non-domain-swapping architectures of the truncated frog TRPV4 and the mutated rat TRPV6 structures.

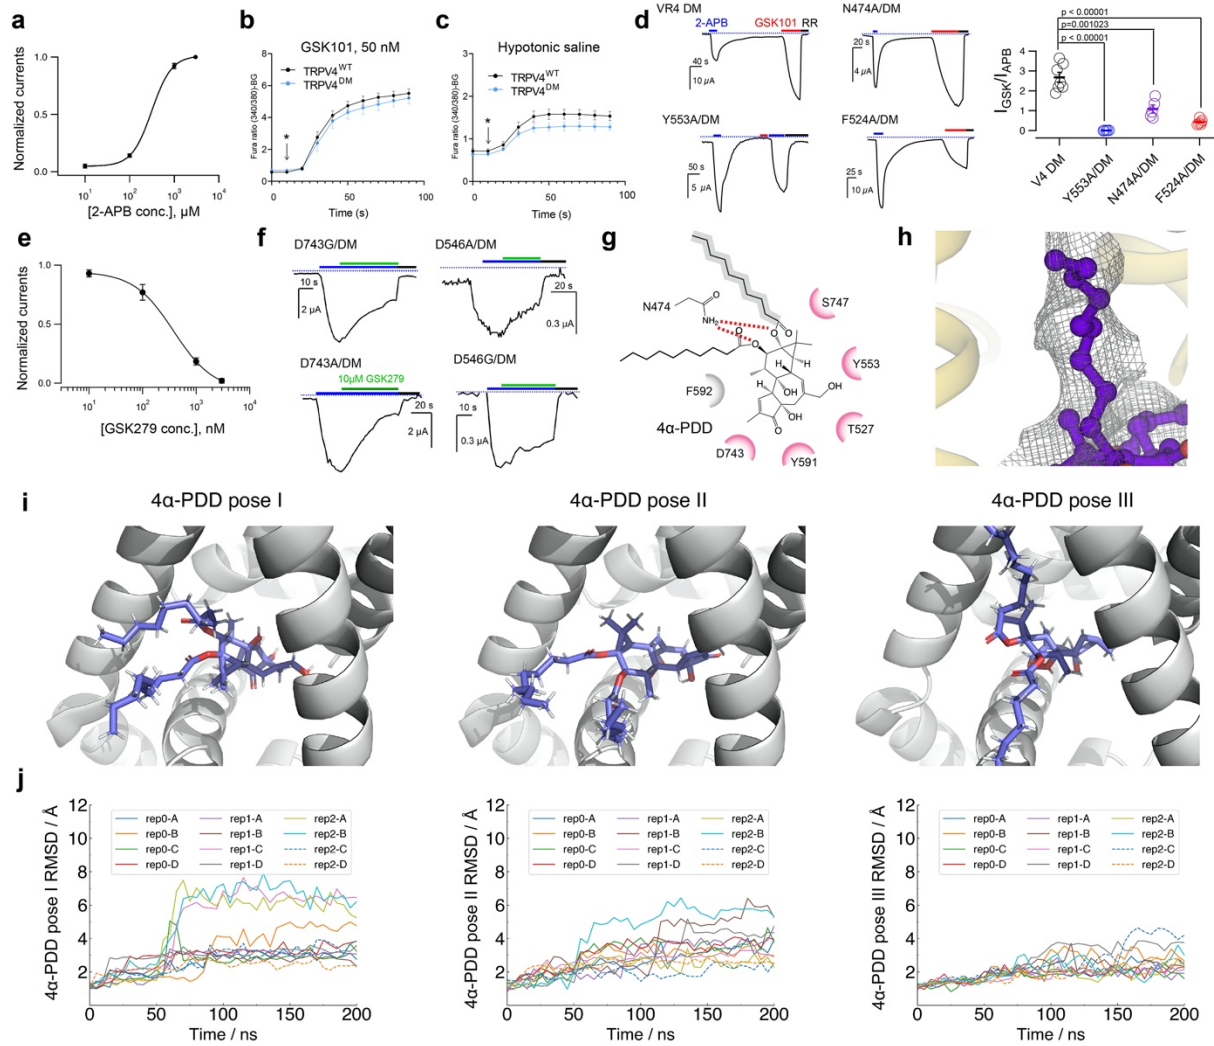

**Supplementary Fig. 6. Effects of GSK compounds and osmolarity on TRPV4<sup>DM</sup> and MD simulation of 4α-PDD binding poses**

**a**, TRPV4<sup>DM</sup> (VR4<sup>DM</sup>) mean normalized concentration-response relations for 2-APB. Data are shown as mean ± SEM (n = 4 oocytes). The curves are fit to the Hill equation with EC<sub>50</sub> = 312 ± 12 μM.

**b,c**, TRPV4<sup>DM</sup> mutant shows preserved stimulated calcium influx responses. Averaged ratiometric calcium plots from ratiometric calcium imaging experiments. MN-1 cells were transfected with GFP-tagged TRPV4 plasmids and stimulated with **(b)** GSK101 (50 nM) or **(c)** hypotonic saline. Baseline and hypotonic saline-stimulated calcium responses were then measured over time and then averaged, n = 11 wells per condition, with 20-40 transfected cells per well. Data are shown as mean ± SEM.

**d**, Probing the GSK101 binding site. Two-electrode voltage-clamp (TEVC) recordings of TRPV4<sup>DM</sup> (N456H/W737R) and additional mutants made in the background of TRPV4<sup>DM</sup>, as indicated. Currents at -60 mV were elicited by 2 mM 2-APB, then 5 μM GSK101 was applied,

and 20  $\mu$ M ruthenium red (RR) was finally introduced, as indicated by colored horizontal lines. (Right) Summary of the ratio between currents activated by 2 mM 2-APB and 5  $\mu$ M GSK101, data are shown as mean  $\pm$  SEM, for VR4 DM, Y553A/DM, N474A/DM, F524A/DM, n=7, 5, 5, 6 oocytes, respectively, *P* values are calculated by two-tailed Student's *t* test as shown in the figure.

**e**, Concentration-response curve for the effects of GSK279 on the 2 mM 2-APB-stimulated currents as a percent of the maximal inhibition response with the presence of 50  $\mu$ M RR. The values are expressed as a mean  $\pm$  SEM. n=4-5 oocytes for each data point,  $IC_{50}=379.8 \pm 32.2$  nM.

**f**, Probing the inhibitor binding site. TEVC recordings of TRPV4<sup>DM</sup> and additional mutants made in the background of TRPV4<sup>DM</sup>, as indicated. Currents at -60 mV induced by 2 mM 2-APB then co-application of 4  $\mu$ M GSK279 followed by 20  $\mu$ M RR, as indicated by colored horizontal lines.

**g**, Ligplot<sup>94</sup> schematics of the 4 $\alpha$ -PDD interaction with TRPV4, with key chemical positions labelled. Pink colored residues are involved in both GSK101 and GSK279 bindings.

**h**, Cryo-EM densities (gray mesh) for the C-terminal tail of 4 $\alpha$ -PDD (violet stick). Densities are contoured at 0.28 thresholding.

**i**, Illustration of ligand-binding poses of 4 $\alpha$ -PDD: pose I (left), pose II (middle), and pose III (right).

**j**, Ligand RMSD values of 4 $\alpha$ -PDD pose I show large deviations from the initial configuration with an average RMSD of 3.53 Å (left). Ligand RMSD values of 4 $\alpha$ -PDD pose II show large deviations from the initial configuration with an average RMSD of 3.65 Å (middle). Ligand RMSD values of 4 $\alpha$ -PDD pose III show relatively stable ligand binding with an average RMSD of 2.55 Å, except for one outlier ligand, rep2-D, which stumbles out of the pocket (right). Source data for (**a-f**) are provided as a Source Data file.

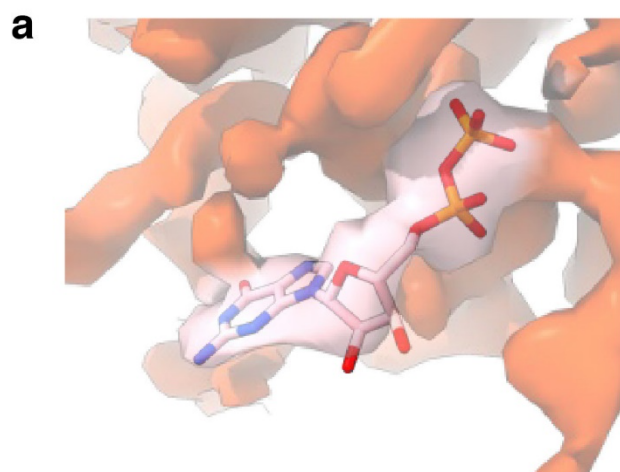

TRPV4-RhoA GDP

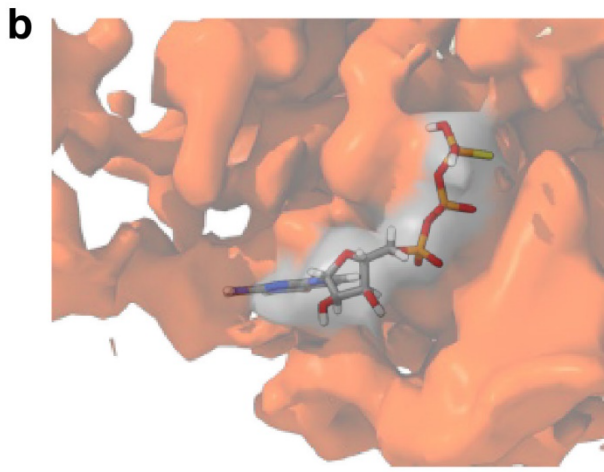

TRPV4-RhoA GTP $\gamma$ S

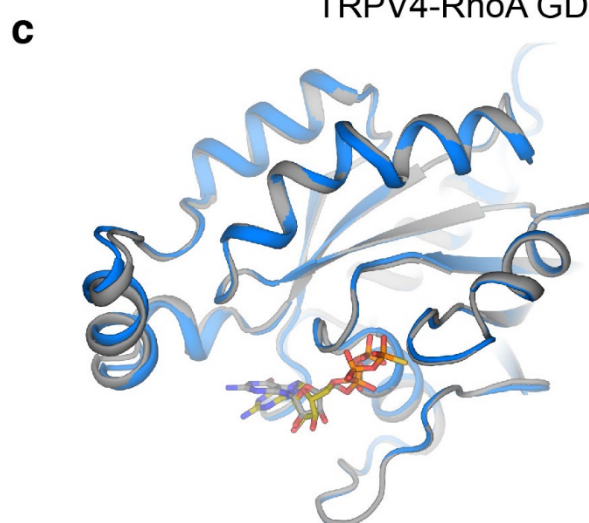

TRPV4-RhoA GDP

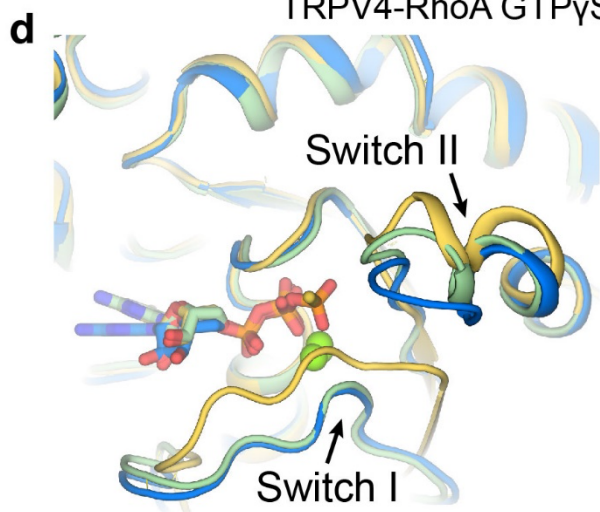

TRPV4-RhoA GTP $\gamma$ S

GDP-bound RhoA

GTP-bound RhoA

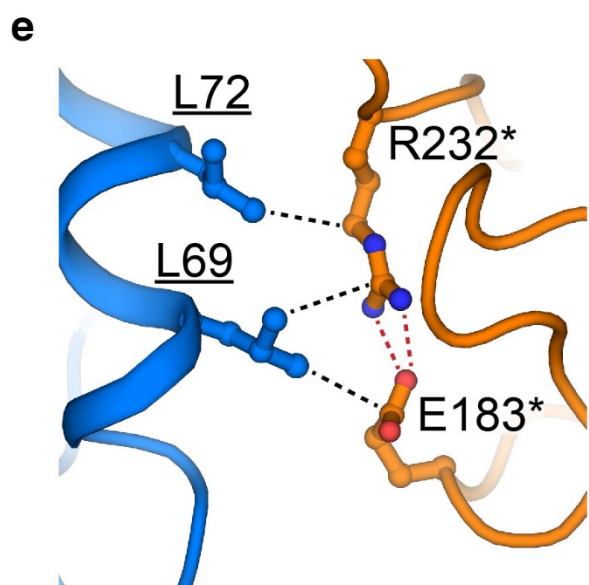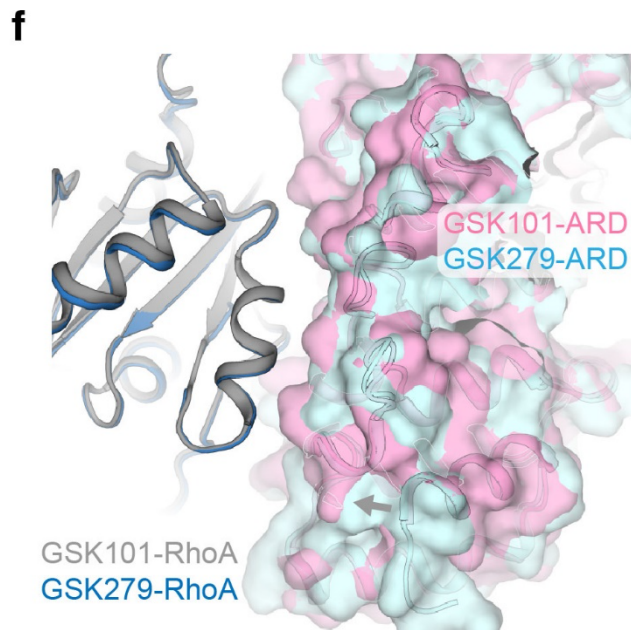

**Supplementary Fig. 7. Comparisons of structures of RhoA in complex with TRPV4 and published structures of RhoA alone**

**a,b**, Close-up view at the nucleotide binding site of RhoA in 3D reconstructions of GSK279-TRPV4-RhoA-GDP (**a**) and GSK101-TRPV4-RhoA-GTP $\gamma$ S (**b**) at thresholding 0.17 and 0.135, respectively. Nucleotides are shown as sticks.

**c**, Comparison of the conformations of RhoA in GSK279-TRPV4-RhoA-GDP and GSK101-TRPV4-RhoA-GTP $\gamma$ S. Nucleotides are shown as sticks.

**d**, Comparison of RhoA conformations in GSK279-TRPV4-RhoA-GDP (blue), GDP-bound RhoA alone (PDB-1FTN, green), and GTP $\gamma$ S-bound RhoA alone (PDB-1A2B, gold). Nucleotides are shown as sticks and magnesium ions are shown as spheres.

**e**, Interaction of TRPV4-ARD and RhoA. The salt bridge between R232 and E183 in TRPV4 appears to be important for RhoA binding. Underlined residues located in RhoA, and annotated residues indicate disease-causing mutations. The red and black dotted lines indicate salt bridges and hydrophobic interactions, respectively.

**f**, Comparison of the interaction interface between GSK279-TRPV4-RhoA-GDP and GSK101-TRPV4-RhoA-GTP $\gamma$ S.

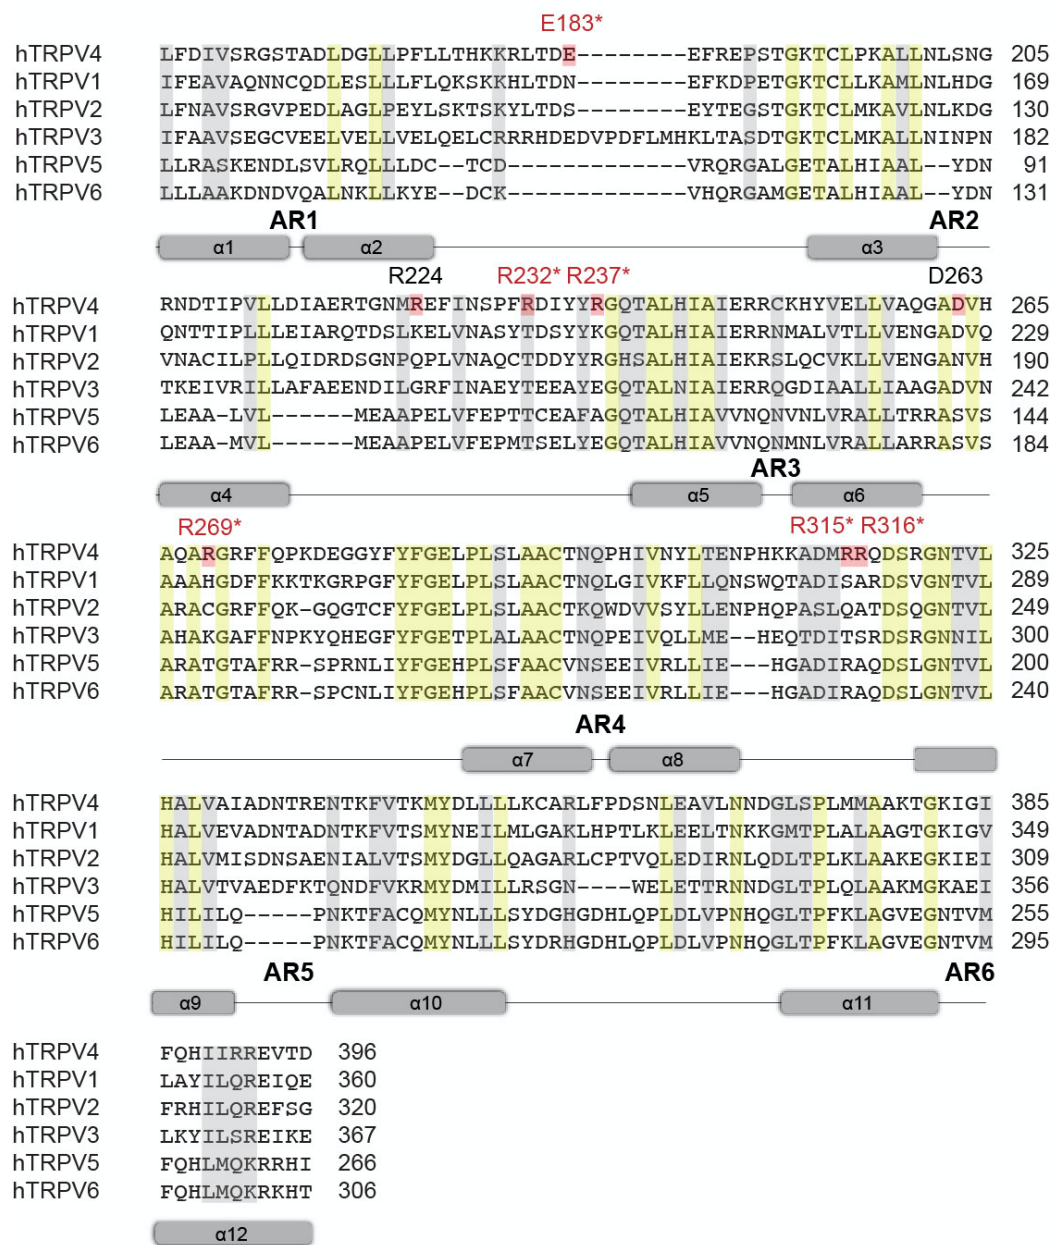

**Supplementary Fig. 8. Sequence alignment of the ARDs in human TRPV channels**

The  $\alpha$ -helices are shown as gray cylinders, well-conserved residues are highlighted in yellow (identical) and gray (similar), and key residues for TRPV4 interaction are colored in red. Asterisks indicate residues mutated in TRPV4-mediated neuromuscular disease.

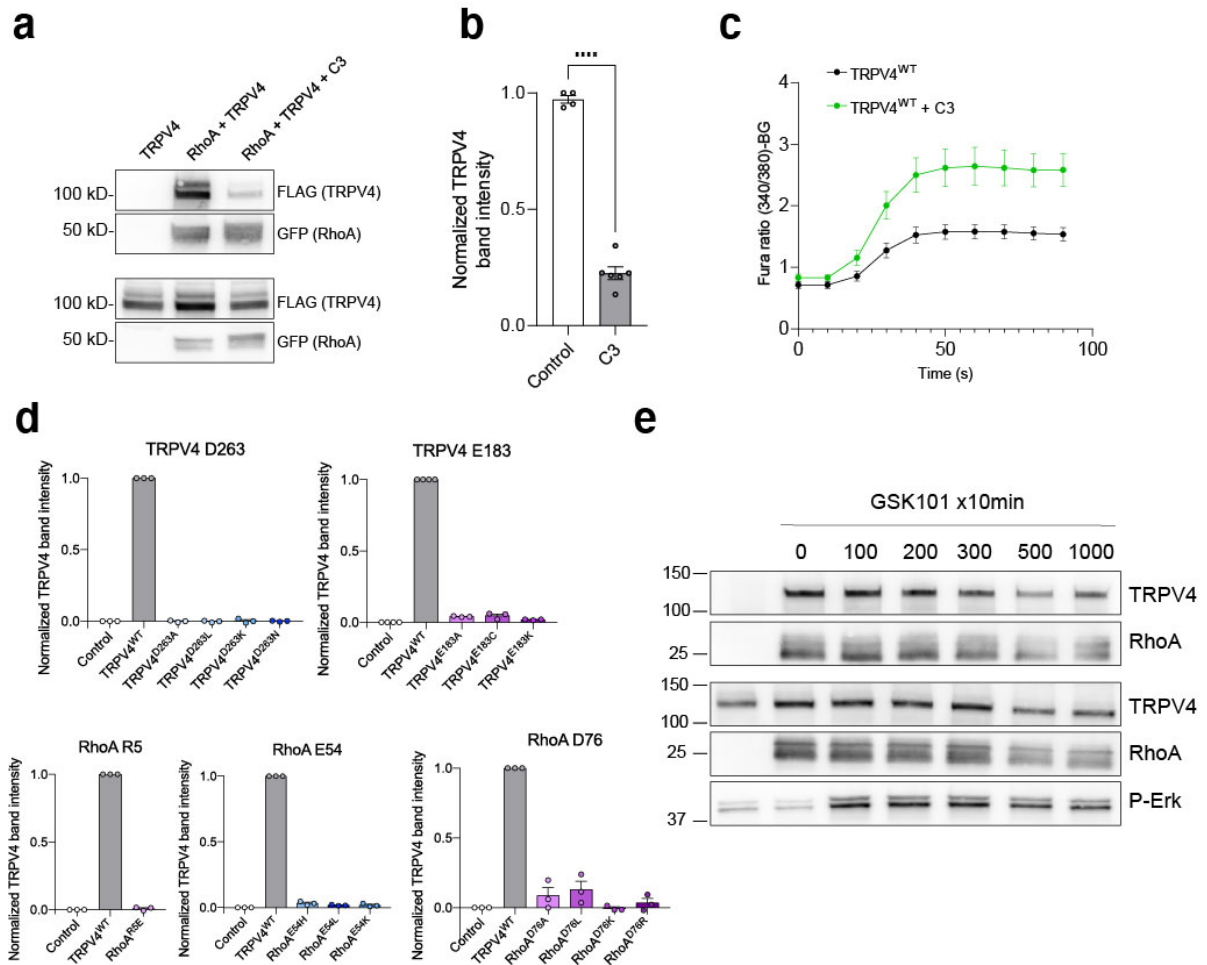

**Supplementary Fig. 9 Inhibition of the interaction between TRPV4 and RhoA by RhoA inhibitors and mutations at the interface**

**a**, Co-immunoprecipitation of HEK293T cells transfected with TRPV4-FLAG and RhoA-GFP with or without treatment with the RhoA inhibitor C3 transferase (0.5  $\mu\text{g/ml}$ ) for 12 hours demonstrates reduced TRPV4-RhoA interaction.

**b**, Quantification of densitometry of TRPV4 bands on western blots,  $n = 4$  (control) and 6 (C3 transferase). \*\*\*\* $p < 0.0001$ .  $P$  value was calculated using two-tailed unpaired  $t$  test. Data are shown as mean  $\pm$  SEM.

**c**, Averaged ratiometric calcium plots from ratiometric calcium imaging experiments. MN-1 cells were transfected with GFP-tagged TRPV4 plasmids and treated with C3 transferase (1  $\mu\text{g/ml}$ ) or vehicle for 2 hours and then stimulated with hypotonic saline. Baseline and hypotonic saline-stimulated calcium responses were then measured over time and then averaged,  $n = 11$  wells per condition for control and 12 wells per condition for C3 transferase, with 20-40 transfected cells per well. Data are shown as mean  $\pm$  SEM.

**d**, Quantification of densitometry of TRPV4 bands on western blots,  $n = 3$  independent experiments for each set of mutants. Data are shown as mean  $\pm$  SEM.



**e**, Representative western blot of co-immunoprecipitation of TRPV4-GFP and RhoA-Myc expressed in HEK293T cells, 1:2 ratio, IP: anti-Myc. Cells were treated with the indicated concentrations ( $\mu\text{M}$ ) of GSK101 for 10 minutes prior to lysis. The experiment was performed three times with similar results. Data are presented as means  $\pm$  SEM. Source data for **(b-d)** are provided as a Source Data file.

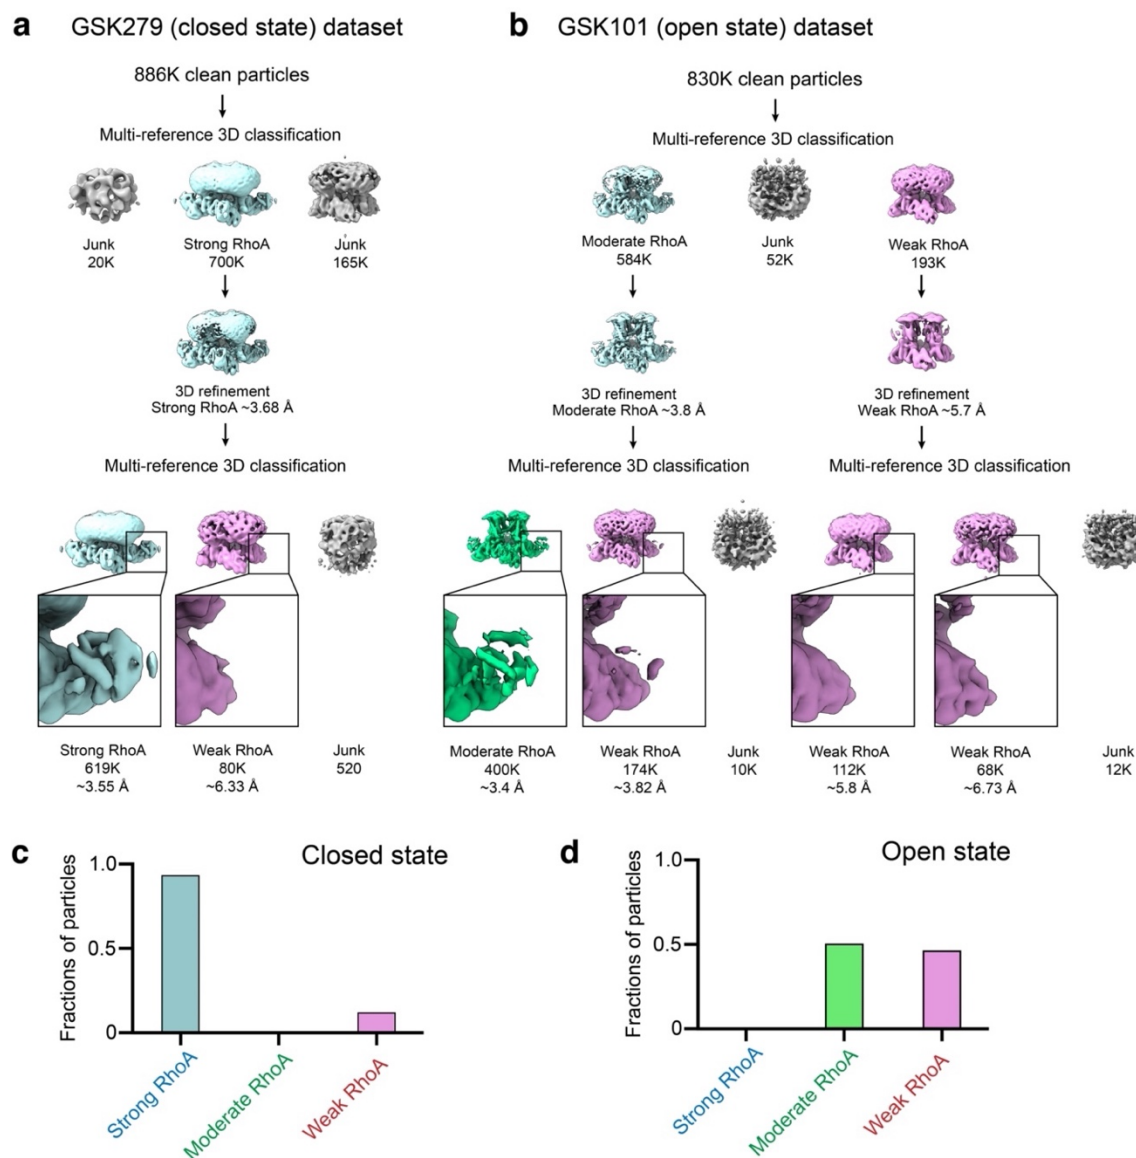

**Supplementary Fig. 10. Image processing workflow for the RhoA-bound fraction analysis**

**a**, Data processing workflow of GSK279-TRPV4-RhoA dataset for the purpose of the RhoA-bound fraction analysis. 3D reconstruction thresholding of 0.58.

**b**, Data processing workflow of GSK101-TRPV4-RhoA dataset for the purpose of the RhoA-bound fraction analysis. The red- and blue-outlined subsets indicate the RhoA-bound fraction and RhoA-unbound fraction, respectively. 3D reconstruction thresholding of 0.58.

**c**, Class distributions of particles for GSK279-TRPV4-RhoA.

**d**, Class distributions of particles for GSK101-TRPV4-RhoA.

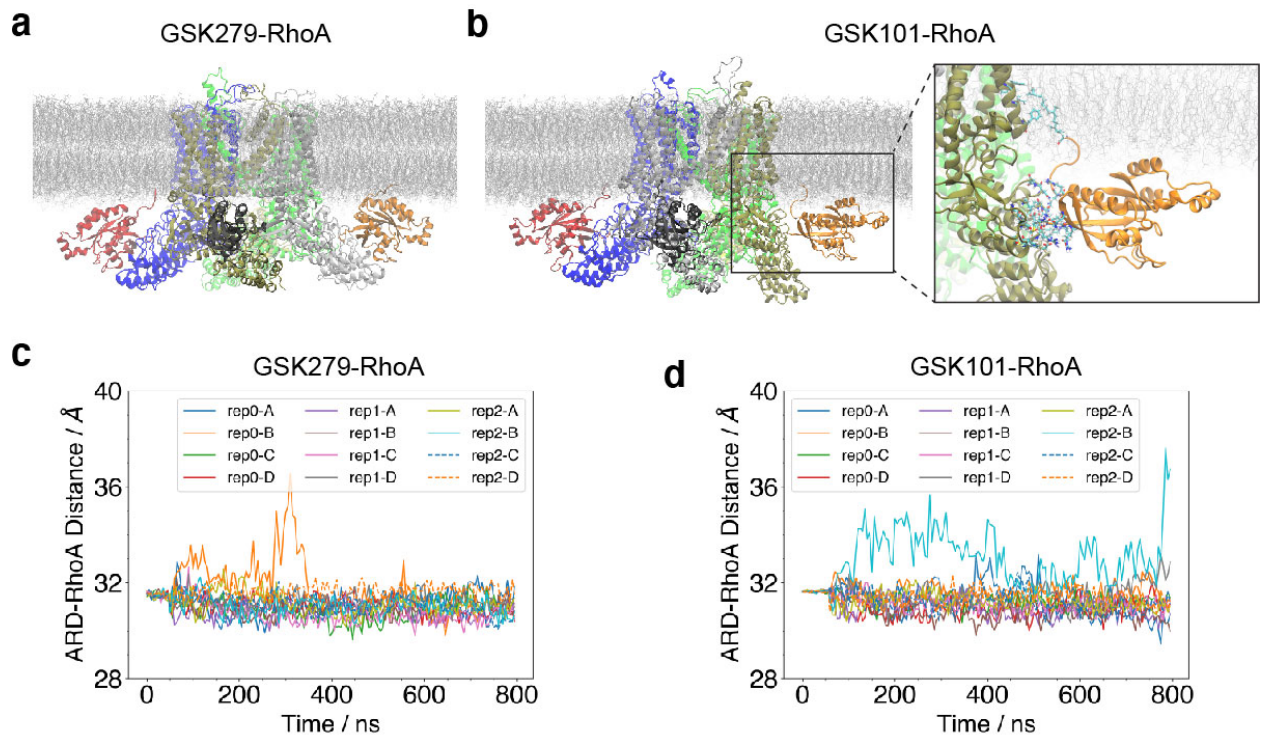

**Supplementary Fig. 11. RhoA binding stability to TRPV4 ARD in the MD simulations**

**a**, A representative snapshot at the end of 800-ns simulation of GSK279-TRPV4-RhoA complex. RhoA proteins stay bound to TRPV4.

**b**, A snapshot at the end of 800-ns simulation of GSK101-TRPV4-RhoA complex where the RhoA protein flips up and loses the majority of the polar contacts with TRPV4. Inset shows the residues that are in contact, a few polar contacts remain in the flip-up configuration. prenylated tail of RhoA interacts with hydrophobic residues of S2 helix.

**c,d**, Center-of-mass distance between RhoA and TRPV4 ARD as a function of time for both GSK279-bound (c) and GSK101-bound (d) states. In the case of GSK101-bound, one replica site shows persistent RhoA fluctuations and ends up in the flip-up pose.

**Supplementary Table 1. Cryo-EM data collection, refinement, and validation statistics.**

|                                                      | TRPV4-RhoA<br>GSK2798745<br>(EMDB-28975)<br>(PDB-8FC7) | TRPV4<br>GSK1016790A<br>(EMDB-28976)<br>(PDB-8FC8) | TRPV4-RhoA<br>GSK1016790A<br>(PDB-8FCB) | TRPV4-RhoA<br>ligand-free<br>(EMDB-28977)<br>(PDB-8FC9) | TRPV4<br>4 $\alpha$ -PDD<br>(EMDB-28978)<br>(PDB-8FCA) |
|------------------------------------------------------|--------------------------------------------------------|----------------------------------------------------|-----------------------------------------|---------------------------------------------------------|--------------------------------------------------------|
| <b>Data collection and processing</b>                |                                                        |                                                    |                                         |                                                         |                                                        |
| Magnification                                        | 81,000                                                 | 81,000                                             |                                         | 81,000                                                  | 81,000                                                 |
| Voltage (kV)                                         | 300                                                    | 300                                                |                                         | 300                                                     | 300                                                    |
| Electron exposure (e <sup>-</sup> / $\text{\AA}^2$ ) | 60                                                     | 60                                                 |                                         | 60                                                      | 60                                                     |
| Defocus range ( $\mu\text{m}$ )                      | -0.8 to -1.8                                           | -0.8 to -1.8                                       |                                         | -0.8 to -1.8                                            | -0.8 to -1.8                                           |
| Pixel size ( $\text{\AA}$ )                          | 1.08                                                   | 1.08                                               |                                         | 1.08                                                    | 1.08                                                   |
| Symmetry imposed                                     | C4                                                     | C4                                                 |                                         | C4                                                      | C4                                                     |
| Initial particles images (no.)                       | 2,111,563                                              | 8,119,132                                          |                                         | 3,412,804                                               | 4,418,471                                              |
| Final particles images (no.)                         | 119,462                                                | 73,349                                             | 207,645                                 | 172,225                                                 | 244,007                                                |
| Map resolution ( $\text{\AA}$ )                      | 3.3                                                    | 3.52                                               | 3.43                                    | 3.75                                                    | 3.45                                                   |
| FSC threshold                                        | 0.143                                                  | 0.143                                              | 0.143                                   | 0.143                                                   | 0.143                                                  |
| <b>Refinement</b>                                    |                                                        |                                                    |                                         |                                                         |                                                        |
| Initial model used (PDB code)                        | TRPV1 (7LP9)<br>RhoA (1FTN)                            | PDB-8FC7                                           | PDB-8FC7                                | PDB-8FC7                                                | PDB-8FC7                                               |
| Map sharpening <i>B</i> factor ( $\text{\AA}^2$ )    | -136                                                   | -160                                               | -183                                    | -195                                                    | -165                                                   |
| Model composition                                    |                                                        |                                                    |                                         |                                                         |                                                        |
| Non-hydrogen atoms                                   | 25,716                                                 | 19,768                                             | 25,232                                  | 21,812                                                  | 18,460                                                 |
| Protein residues                                     | 3,284                                                  | 2,468                                              | 3,228                                   | 3,092                                                   | 2,400                                                  |
| Ligands                                              | 12                                                     | 8                                                  | 12                                      | 0                                                       | 8                                                      |
| <i>B</i> factors ( $\text{\AA}^2$ )                  |                                                        |                                                    |                                         |                                                         |                                                        |
| Protein                                              | 89.95                                                  | 82.56                                              | 101.89                                  | 136.85                                                  | 91.41                                                  |
| Ligand                                               | 68.98                                                  | 50.97                                              | 44.81                                   | -                                                       | 62.40                                                  |
| R.m.s deviations                                     |                                                        |                                                    |                                         |                                                         |                                                        |
| Bond lengths ( $\text{\AA}$ )                        | 0.004                                                  | 0.003                                              | 0.004                                   | 0.004                                                   | 0.005                                                  |
| Bond angles ( $^\circ$ )                             | 1.077                                                  | 0.568                                              | 0.967                                   | 0.562                                                   | 0.649                                                  |
| <b>Validation</b>                                    |                                                        |                                                    |                                         |                                                         |                                                        |
| MolProbity score                                     | 1.58                                                   | 1.17                                               | 1.39                                    | 1.06                                                    | 1.33                                                   |
| Clashscore                                           | 5.47                                                   | 2.35                                               | 4.14                                    | 3.81                                                    | 6.01                                                   |
| Poor rotamers (%)                                    | 0                                                      | 0.19                                               | 0.16                                    | 0.22                                                    | 0                                                      |
| Ramachandran plot                                    |                                                        |                                                    |                                         |                                                         |                                                        |
| Favored (%)                                          | 95.83                                                  | 97.15                                              | 96.85                                   | 98.56                                                   | 98.32                                                  |
| Allowed (%)                                          | 4.17                                                   | 2.85                                               | 3.15                                    | 1.44                                                    | 1.68                                                   |
| Disallowed (%)                                       | 0                                                      | 0                                                  | 0                                       | 0                                                       | 0                                                      |

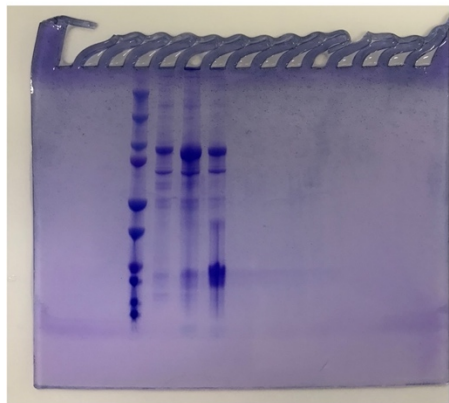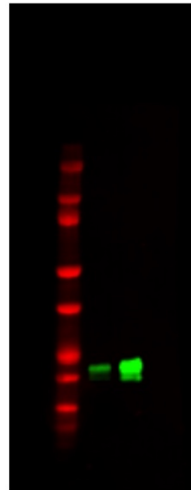

Anti-RhoA

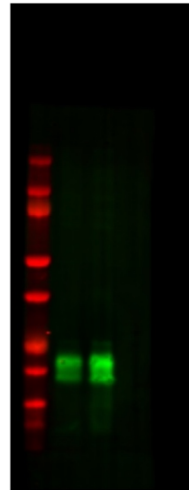

Anti-RhoB

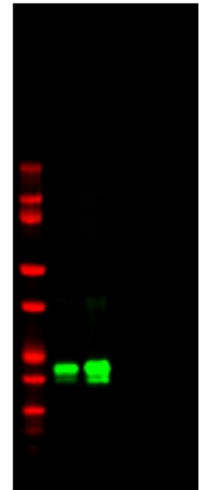

Anti-RhoC

RhoA: (1:1000, Cell Signaling Technology, 2117)  
RhoB: (1:1000, Cell Signaling Technology, 2098)  
RhoC: (1:1000, Cell Signaling Technology, 3430)

**Source Data for Supplementary Fig. 1a.**

The uncropped gel and blots used in Supplementary Fig. 1a are shown.

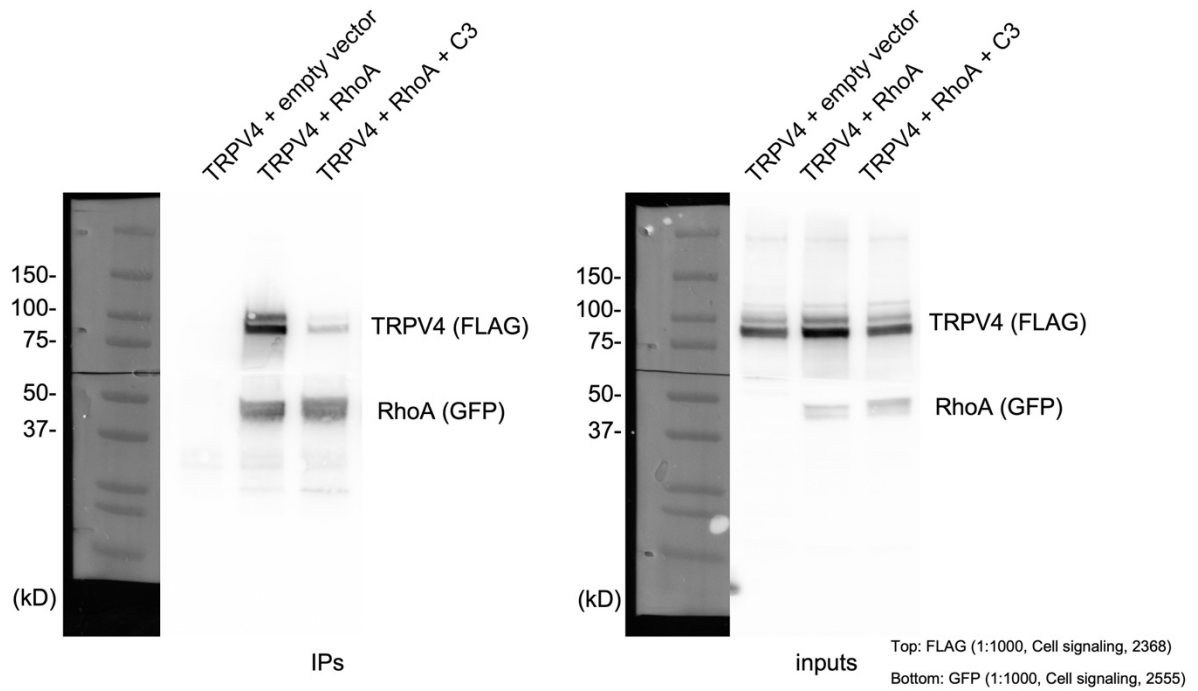

**Source Data for Supplementary Fig. 9a.**

The uncropped blots used in Supplementary Fig. 9a are shown.

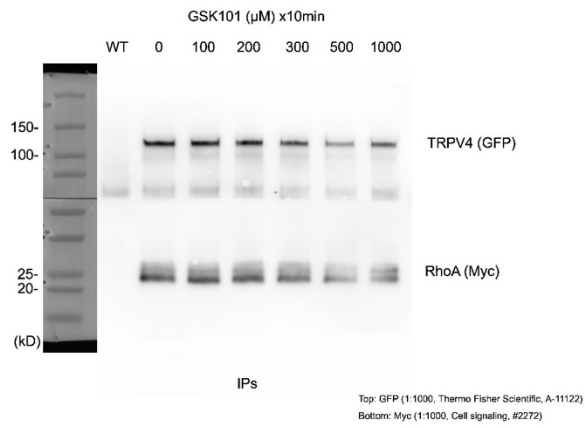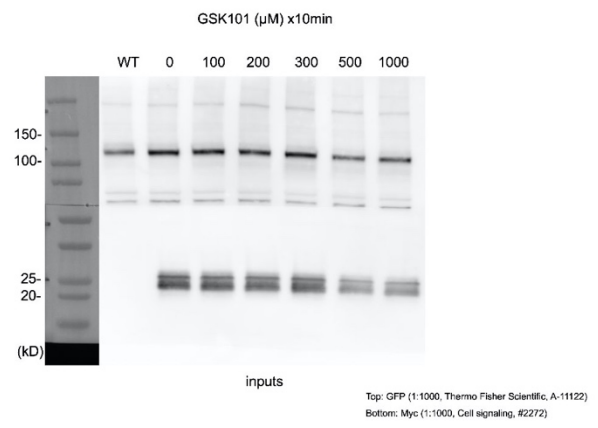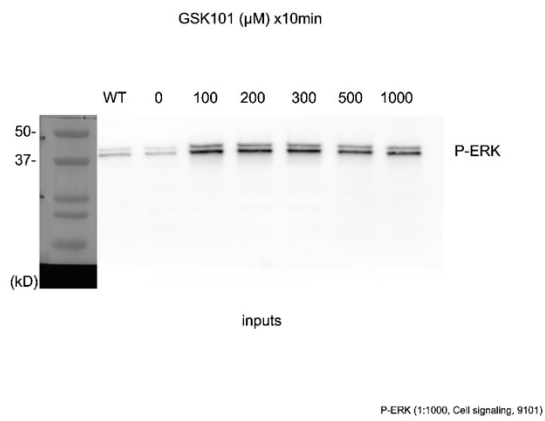

### Source Data for Supplementary Fig. 9e.

The uncropped blots used in Supplementary Fig. 9e are shown.
